# Supplementary material for: The identified intrinsic active sites for efficient and stable bi-functional catalyst N-MoS2·Ni3S2/NiS: the Mo–N structure and Ni–S structure on the heterogeneous interface synergistically enhance water splitting
Source: Royal Society of Chemistry journal article supplement (doi:10.1039/d2ta01333a), 2022-01-01
Supplement: d2ta01333a1.pdf [file d2ta01333a1.pdf]

## Supporting Information

### **The Identified Intrinsic Active Sites for Efficient and Stable Bi-functional Catalyst N-MoS<sub>2</sub>·Ni<sub>3</sub>S<sub>2</sub>/NiS: Mo-N Structure and Ni-S Structure on Heterogeneous Interface Synergistically Enhance Water Splitting**

Yong Gao<sup>a</sup>, Jingjing Li<sup>a</sup>, Hao Gong<sup>b</sup>, Chuanxiang Zhang<sup>c</sup>, Haiyun Fan<sup>a</sup>, Xin Xie<sup>a</sup>, Xianli Huang<sup>a</sup>, Hairong Xue<sup>a</sup>, Tao Wang<sup>a,\*</sup>, Jianping He<sup>a,\*</sup>

<sup>a</sup> College of Materials Science and Technology, Nanjing University of Aeronautics and Astronautics, Nanjing 210016, P. R. China.

<sup>b</sup> Department of Chemistry and Materials Science, College of Science, Nanjing Forestry University, Nanjing 210037, P. R. China.

<sup>c</sup> School of Materials Science and Engineering, Nanjing Institute of Technology, Nanjing 211167, China.

\*Corresponding author Email: [wangtao0729@nuaa.edu.cn](mailto:wangtao0729@nuaa.edu.cn) (T. Wang); [jianph@nuaa.edu.cn](mailto:jianph@nuaa.edu.cn) (J. He).

## Experimental Section

### 1.1 Materials

All raw materials were purchased without further purification. Ammonium molybdate ((NH<sub>4</sub>)<sub>6</sub>Mo<sub>7</sub>O<sub>24</sub>·4H<sub>2</sub>O, AR, 99%), thioacetamide (CH<sub>3</sub>CSNH<sub>2</sub>, AR, 99%), sodium thiosulfate (Na<sub>2</sub>S<sub>2</sub>O<sub>3</sub>·5H<sub>2</sub>O, AR, 99%) were purchased from Macklin Biochemical Co. Ltd. (Shanghai, China). DI water was obtained in the laboratory. And NF (1 cm × 2 cm × 0.5 mm) was obtained from commercial sources.

### 1.2 Synthesis of catalysts

**Synthesis of N-MoS<sub>2</sub>·Ni<sub>3</sub>S<sub>2</sub>/NiS:** Firstly, ((NH<sub>4</sub>)<sub>6</sub>Mo<sub>7</sub>O<sub>24</sub>·4H<sub>2</sub>O (0.13 mmol, 0.158 g) and CH<sub>3</sub>CSNH<sub>2</sub> (2.7 mmol, 0.203 g) were weighed and transferred to 30 mL DI water, and the homogeneous precursor solution was obtained by magnetic stirring for 60 minutes. Subsequently, the NF was immersed in 1.0 M HCl(aq) for 45 minutes under ultrasonic treatment to remove the surface

oxidation, then which was rinsed by DI water and ethanol, then, dried for 10 h in an vacuum oven at 60 °C. Furthermore, after preprocessed NF was added into the above precursor solution and transferred into 50 mL Teflon-lined autoclave, hydrothermal reaction for 12 h at 180 °C. After cooling, the catalyst was taken out and washed thoroughly in turn DI water and ethanol, then dried for 10 h in an vacuum oven at 60 °C. Finally, the N-MoS<sub>2</sub>·Ni<sub>3</sub>S<sub>2</sub>/NiS was performed electrochemical activation through three-electrode system in 1.0 M KOH(aq), importantly, the final long time electrochemical activation step was carry out before HER test is performed, not the OER test. And the loading massing of N-MoS<sub>2</sub>·Ni<sub>3</sub>S<sub>2</sub>/NiS is about 4 mg·cm<sup>-2</sup>. In order to investigate the effect of Mo-N bond for HER performance, several catalysts were synthesized at different hydrothermal temperature (120, 150, 180, 210 °C) through maintaining other condition constant. In addition, the N-MoS<sub>2</sub>·Ni<sub>3</sub>S<sub>2</sub>/NiS-180°C also soaked in different concentrations H<sub>3</sub>PO<sub>4</sub>(aq) (0.0, 0.5, 1.0 M H<sub>3</sub>PO<sub>4</sub>) to further investigate the change of Mo-N bond relative rations.

**Synthesis of N,Mo-Ni<sub>3</sub>S<sub>2</sub>/NiS and Ni<sub>3</sub>S<sub>2</sub>/NiS:** Maintaining other conditions constant, (NH<sub>4</sub>)<sub>6</sub>Mo<sub>7</sub>O<sub>24</sub>·4H<sub>2</sub>O (0.13 mM, 0.158 g) acts as Mo and N source and Na<sub>2</sub>S<sub>2</sub>O<sub>3</sub>·5H<sub>2</sub>O (1.35 mM, 0.338 g) acts as S source to synthesize N,Mo-Ni<sub>3</sub>S<sub>2</sub>/NiS, and only CH<sub>3</sub>CSNH<sub>2</sub> (2.7 mM, 0.203 g) was used to synthesize Ni<sub>3</sub>S<sub>2</sub>/NiS.

**Preparation of the Pt/C-NF and RuO<sub>2</sub>-NF:** 4 mg Pt, 1 mg carbon black and 1 mg PVDF were mixed, then adding appropriating amount of deionized water and grinding evenly, finally put into 60 °C oven drying to obtain Pt/C-NF. The preparation way for RuO<sub>2</sub>-NF is as same as the Pt/C-NF.

### 1.3 Morphology and structure characterization

The crystal phase of N-MoS<sub>2</sub>·Ni<sub>3</sub>S<sub>2</sub>/NiS and control samples were confirmed by XRD (Bruker D8 Advance) at a scanning rate of 5 °·min<sup>-1</sup>. The surface morphology and hierarchical structure were

observed respectively by field emission scanning electron microscope (FE-SEM, Hitachi S-4800) and high-resolution transmission electron microscope (HR-TEM, FEI Tecnai G2F20 microscope). The thickness of N-MoS<sub>2</sub>·Ni<sub>3</sub>S<sub>2</sub>/NiS was testified precisely by atomic force microscope (AFM, Bruker Multimode 8). The element chemical state and valence bond structure of N-MoS<sub>2</sub>·Ni<sub>3</sub>S<sub>2</sub>/NiS and control samples were analyzed comprehensively by X-ray photoelectron spectroscopy (XPS) with a Kratos Axis Ultra DLD electron spectrometer, and all the binding energies were standardized by C 1s peak energy at 284.6 eV. The N<sub>2</sub> adsorption-desorption isotherms were measured at 77 K by an ASAP 2460 system to calculate the specific surface area and analyze the pore size distribution features.

#### 1.4 Electrochemical performance characterization

All electrochemical data were collected on a CHI 760e electrochemical workstation (CHI Instruments, Inc. Shanghai, China). And the classic three-electrode system was used, including carbon rod was served as counter electrode, a SCE for HER and Hg/HgO for OER as reference electrode, and the prepared catalysts as working electrode. Linear sweep voltammetry (LSV) curves were performed at a scan rate of 5 mV·s<sup>-1</sup> in 1.0 M KOH electrolyte with IR-compensation, the HER and OER LSV were measured respectively in N<sub>2</sub>-/O<sub>2</sub>-saturated electrolyte, and the CV activation was performed before LSV test. Importantly, in order to eliminate the influence of nickel oxidation peak for catalytic performance evaluation, adopting backward sweep way to collect OER LSV data. According to the Nernst equation:  $E_{\text{RHE}} = E_{\text{Hg/HgO}} + 0.05916 \times \text{pH} + 0.098\text{V}$  and  $E_{\text{RHE}} = E_{\text{SCE}} + 0.05916 \times \text{pH} + 0.244\text{V}$ , the all potentials have been converted to RHE. The Electrochemical impedance spectroscopy (EIS) was performed with a frequency ranges from 0.01 to 100000Hz. And the ECSA was estimated through evaluating double-layer capacitance ( $C_{\text{dl}}$ ), which was calculated by

different scan rate cyclic voltammetry (CV) from 20 to 100 mV·s<sup>-1</sup> in the non-Faraday potential range. The catalyst stability was evaluated by both Accelerated Stressing Tests (AST) test in the Faraday potential range and Chronoamperometry (i-t) test at the current density of 10 mA·cm<sup>-2</sup>.

### 1.5 Density Functional Theory (DFT) Calculations

We adopted the Vienna Ab initio Simulation Package (VASP) to carry out all first principle Density Functional Theory (DFT) calculation, according to the generalized gradient approximation (GGA) of the Perdew-Burke-Ernzerhof (PBE) formulation<sup>1</sup>, and the projector augmented (PAW) method<sup>2,3</sup>. We set the wave base cutoff to 450 eV, with a vacuum spacing of at least 15 Å perpendicular to the direction of the catalyst. And the Brillouin zone integration is performed using 3×3×1 Monkhorst-Pack k-point sampling for a structure<sup>4</sup>. The convergence threshold of electronic self-consistent was set as 10<sup>-5</sup> eV, and the convergence threshold of geometric structure optimization was set as 0.05 eV/Å. Finally, we calculated the free energy using the following formula<sup>5,6</sup>:

$$G = E + ZPE - TS$$

where G, E, ZPE and TS represent respectively the free energy, total energy obtained from theoretical calculations, zero point energy and entropic contributions.

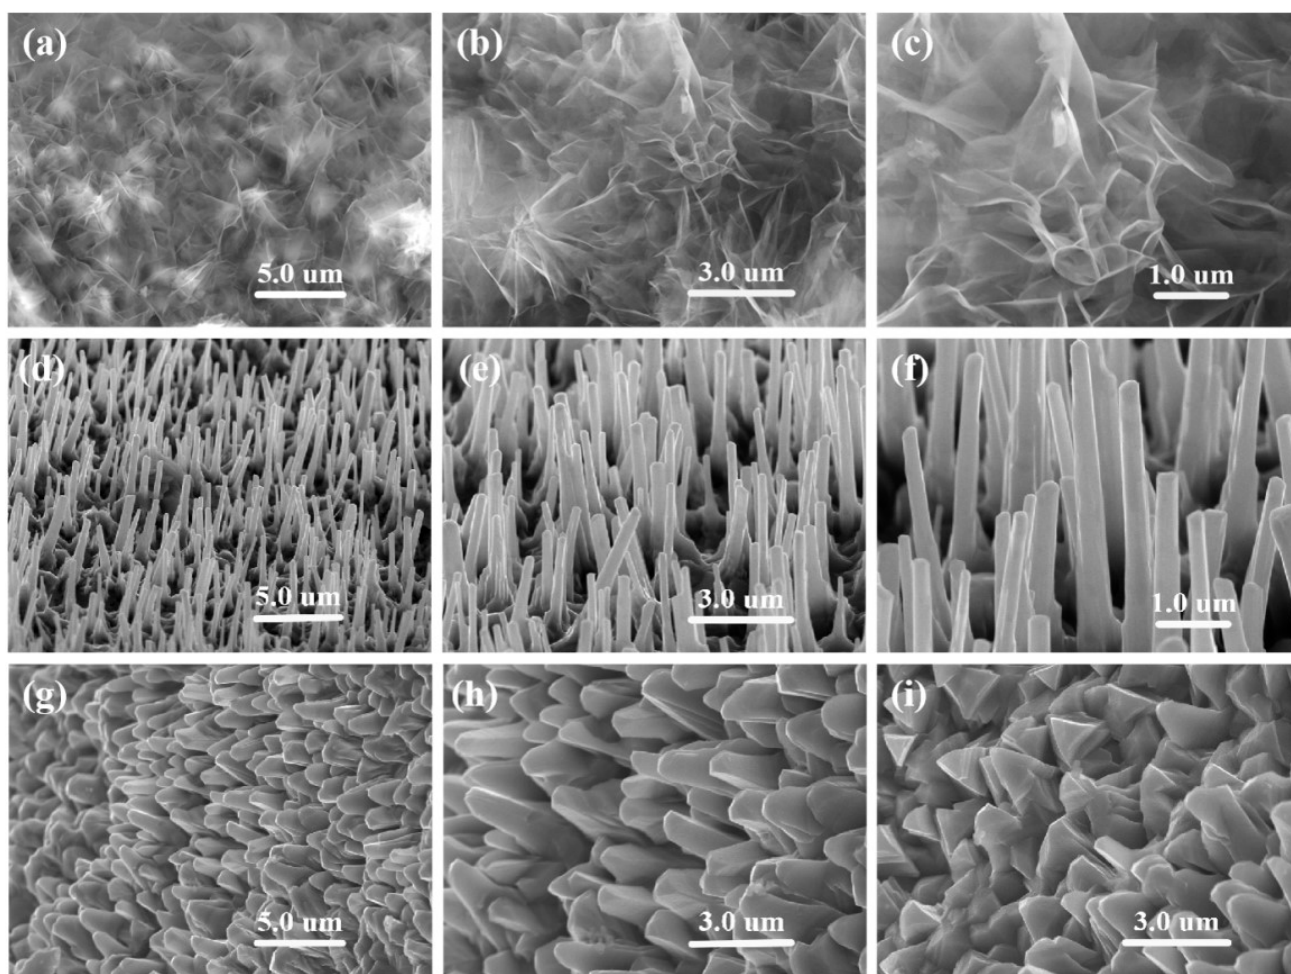

**Fig. S1.** The SEM images of  $\text{N-MoS}_2\cdot\text{Ni}_3\text{S}_2/\text{NiS}$  and control samples. (a-c)  $\text{N-MoS}_2\cdot\text{Ni}_3\text{S}_2/\text{NiS}$ , (d-f)  $\text{N,Mo-Ni}_3\text{S}_2/\text{NiS}$ , (g-i)  $\text{Ni}_3\text{S}_2/\text{NiS}$ .

The control samples  $\text{N,Mo-Ni}_3\text{S}_2/\text{NiS}$  (Fig. S1 d-f) and  $\text{Ni}_3\text{S}_2/\text{NiS}$  (Fig. S1 g-i) shows nanorod array and nanosheet array morphology. Nevertheless, the  $\text{N-MoS}_2\cdot\text{Ni}_3\text{S}_2/\text{NiS}$  shows ultra-thin hierarchical structure with large specific surface area and electrochemical specific surface area, which could provide more active catalytic sites.

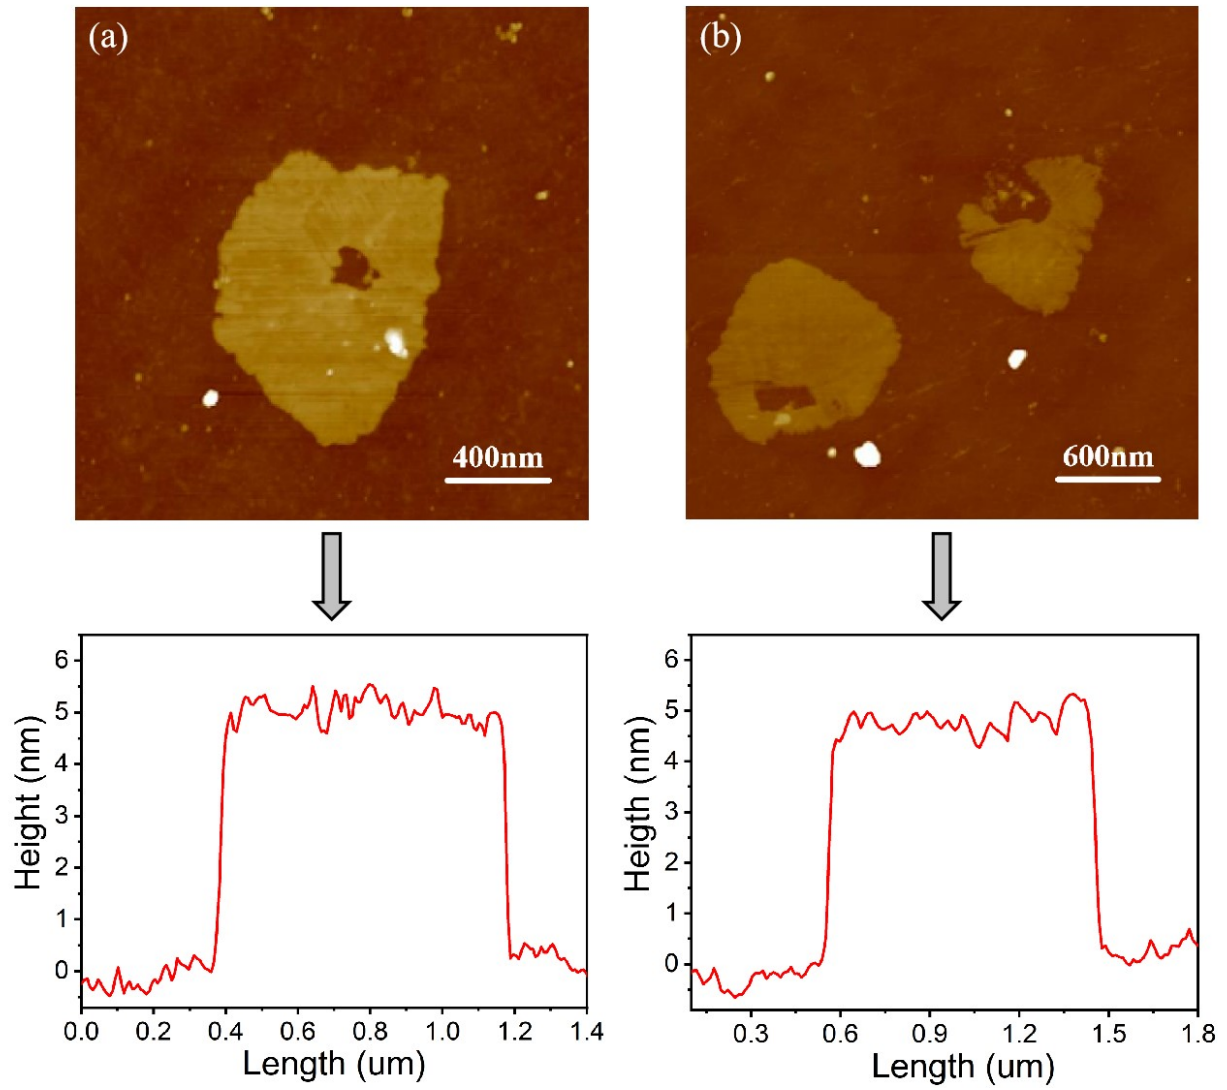

**Fig. S2.** AFM Height images and line-scan profiles images of N-MoS<sub>2</sub>·Ni<sub>3</sub>S<sub>2</sub>/NiS.

The AFM height images reveal precisely that the average thickness is 5.2 nm for N-MoS<sub>2</sub>·Ni<sub>3</sub>S<sub>2</sub>/NiS.

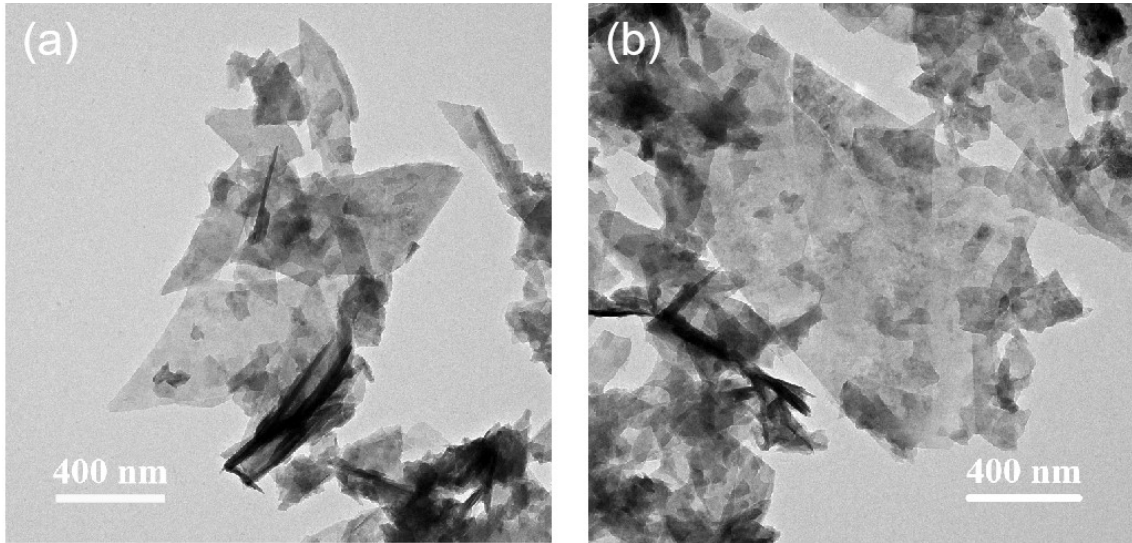

**Fig. S3.** (a, b) TEM images of N-MoS<sub>2</sub>·Ni<sub>3</sub>S<sub>2</sub>/NiS.

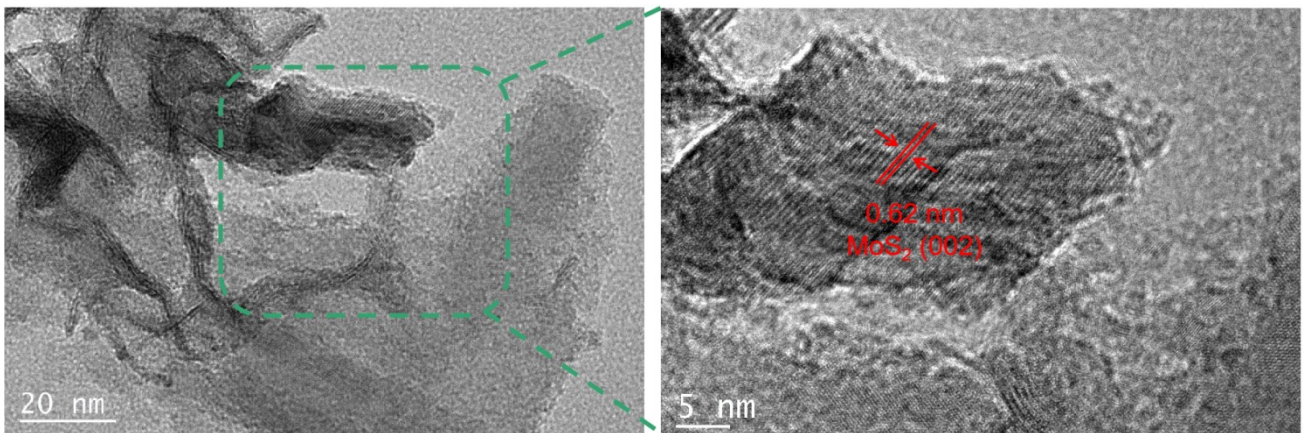

**Fig. S4.** The HR-TEM image of N-MoS<sub>2</sub>·Ni<sub>3</sub>S<sub>2</sub>/NiS.

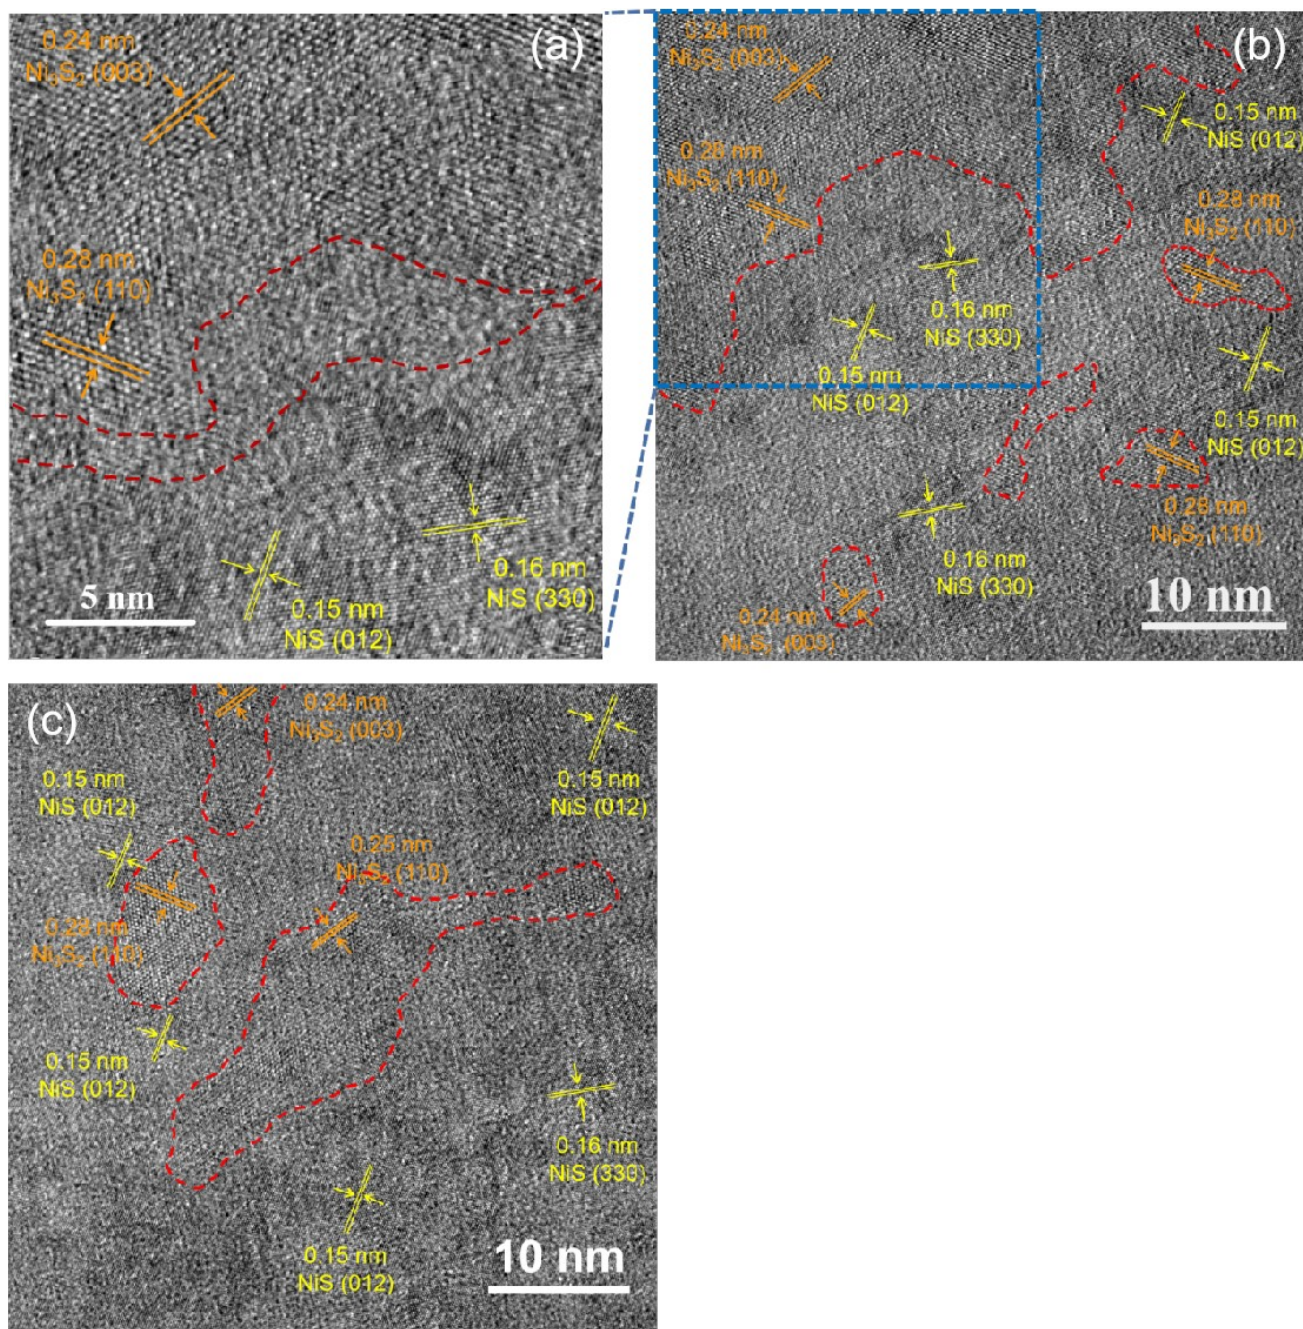

**Fig. S5.** HRTEM image of N-MoS<sub>2</sub>·Ni<sub>3</sub>S<sub>2</sub>/NiS.



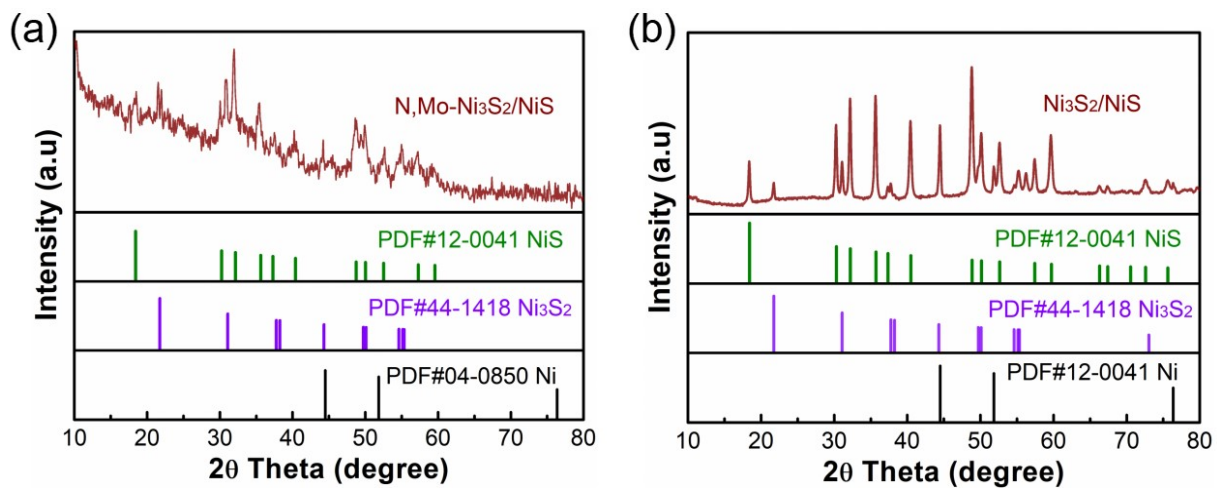

**Fig. S6.** XRD spectrums of (a) N,Mo-Ni<sub>3</sub>S<sub>2</sub>/NiS, (b) Ni<sub>3</sub>S<sub>2</sub>/NiS.

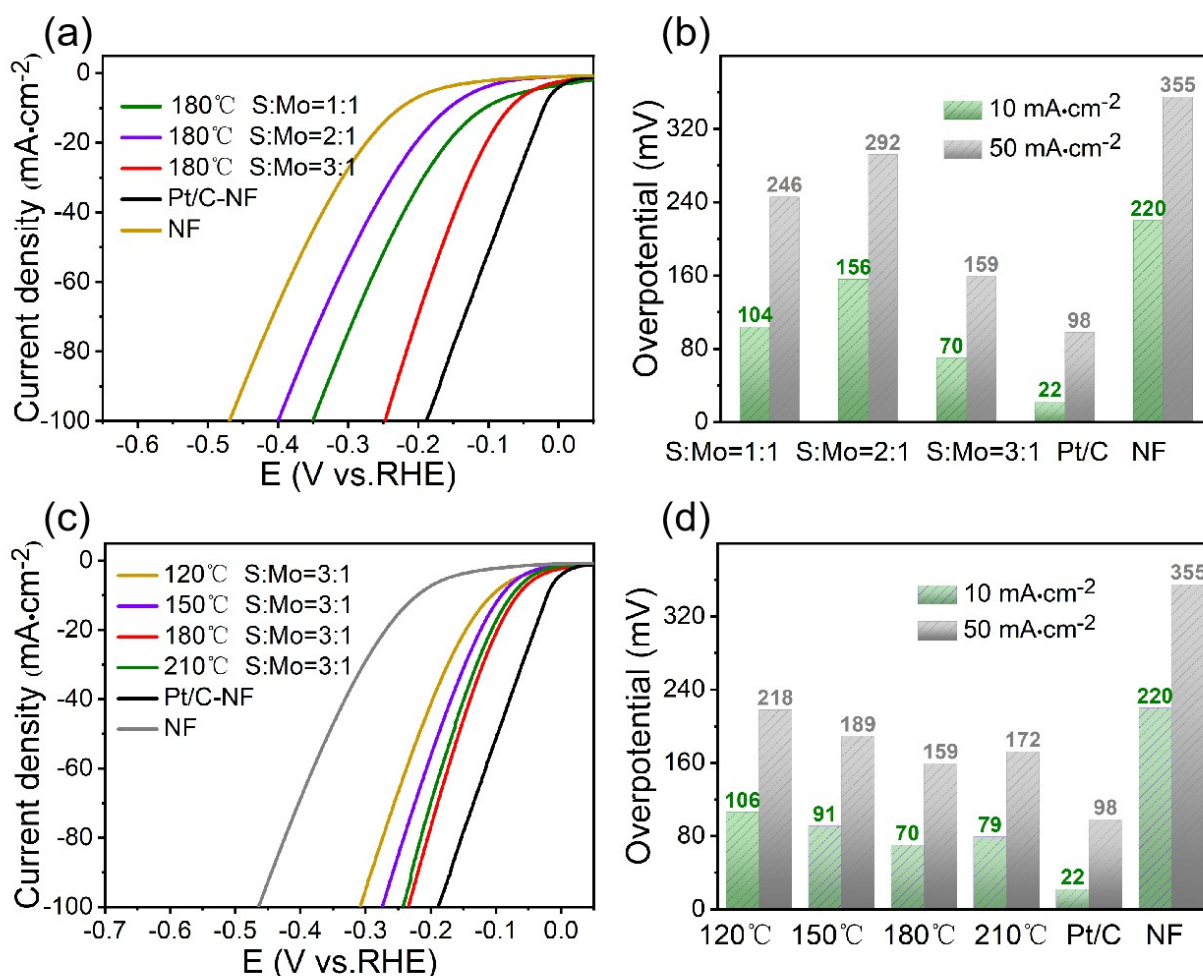

**Fig. S7.** (a) HER LSV curves, (b) corresponding performance plot at 10 and 50 mA·cm<sup>-2</sup> of N-MoS<sub>2</sub>·Ni<sub>3</sub>S<sub>2</sub>/NiS were synthesized at different temperature. (d) HER LSV curves, (e) corresponding performance plot at 10 and 50 mA·cm<sup>-2</sup> N-MoS<sub>2</sub>·Ni<sub>3</sub>S<sub>2</sub>/NiS were synthesized through different molar ratio of S to Mo at 180°C.

Through earlier experiment exploration, the optimum N-MoS<sub>2</sub>·Ni<sub>3</sub>S<sub>2</sub>/NiS was synthesized at 180°C hydrothermal temperature when molar ratio of S to Mo is 3 to 1. Meanwhile, the optimum N-MoS<sub>2</sub>·Ni<sub>3</sub>S<sub>2</sub>/NiS exhibits minimum Tafel slope (95.2 mV·dec<sup>-1</sup>), much lower than other samples, and only slightly higher than Pt/C-NF (54.6 mV·dec<sup>-1</sup>).

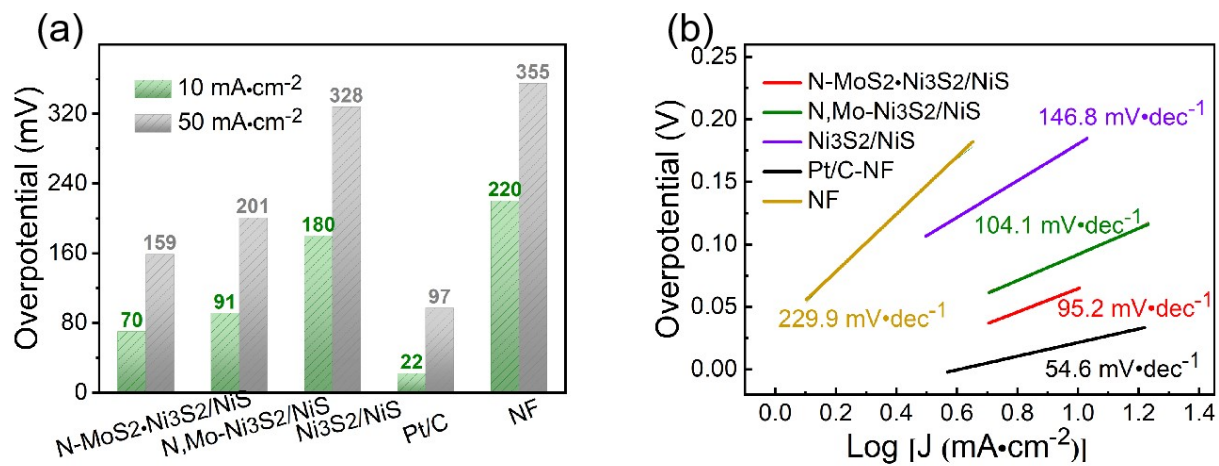

**Fig. S8.** (a) HER performance plot of N-MoS<sub>2</sub>·Ni<sub>3</sub>S<sub>2</sub>/NiS and other control samples at 10 mA·cm<sup>-2</sup> and 50 mA·cm<sup>-2</sup>. (b) Corresponding Tafel slope.

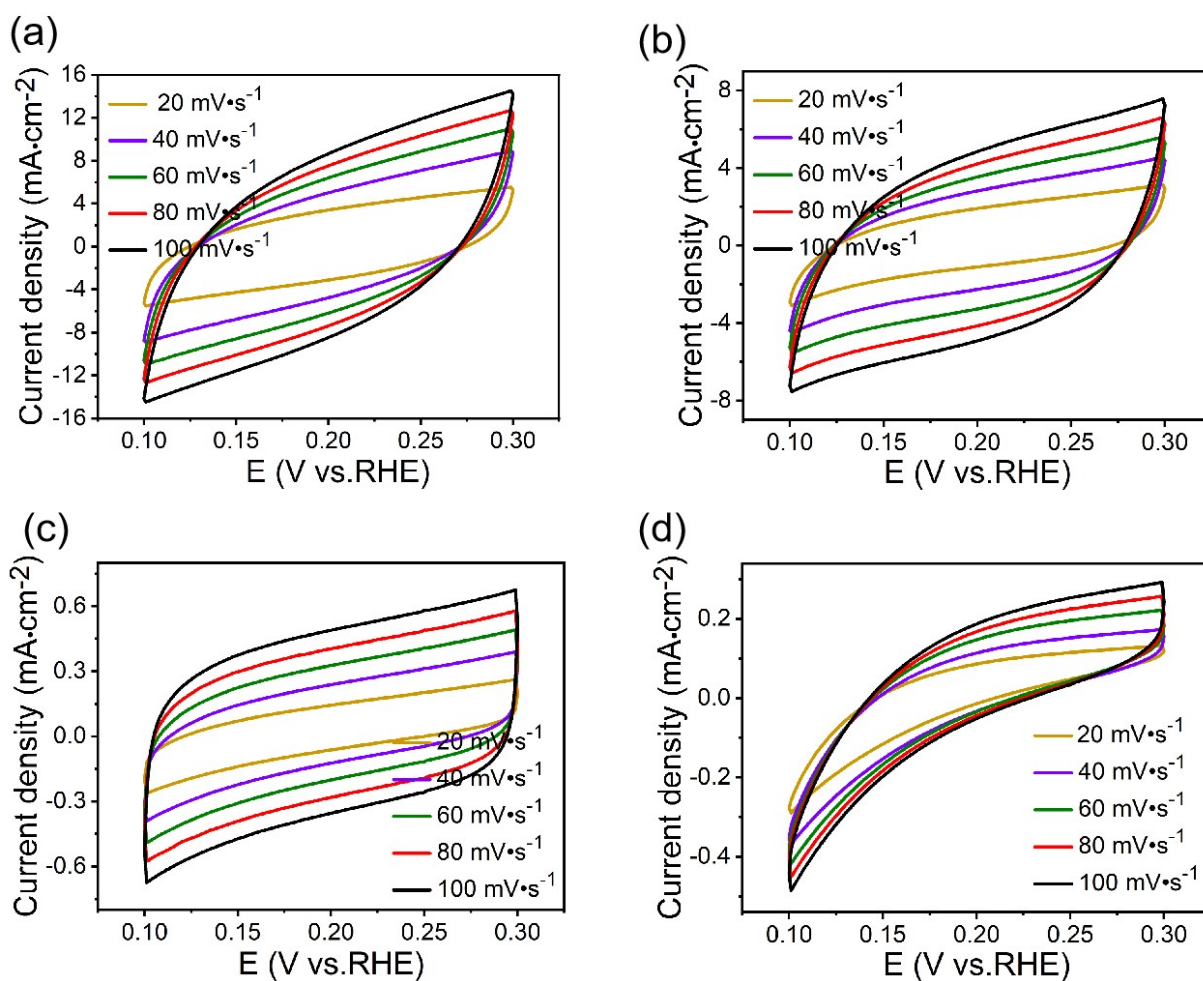

**Fig. S9.** HER Cyclic voltammetry of (a) N-MoS<sub>2</sub>·Ni<sub>3</sub>S<sub>2</sub>/NiS, (b) N,Mo-Ni<sub>3</sub>S<sub>2</sub>/NiS, (c) Ni<sub>3</sub>S<sub>2</sub>/NiS, (d) Ni Foam at scan rate of 20, 40, 60, 80, 100 mV·s<sup>-1</sup> in the potential windows of 0.1V - 0.3V (vs. RHE). (e) Corresponding the double-layer capacitance ( $C_{dl}$ ).

Electrochemical specific surface area (ECSA) reflects the intrinsic activity of catalyst, which can be evaluated by  $C_{dl}$  through the equation,  $ECSA = C_s / C_{dl}$ . Herein, we adopt  $C_{dl}$  to evaluate N-MoS<sub>2</sub>·Ni<sub>3</sub>S<sub>2</sub>/NiS intrinsic catalytic activity. The  $C_{dl}$  is 131 mF·cm<sup>-2</sup> for N-MoS<sub>2</sub>·Ni<sub>3</sub>S<sub>2</sub>/NiS, 83.8 mF·cm<sup>-2</sup> for N,Mo-Ni<sub>3</sub>S<sub>2</sub>/NiS, 8.0 mF·cm<sup>-2</sup> for Ni<sub>3</sub>S<sub>2</sub>/NiS, and 2.1 mF·cm<sup>-2</sup> for Ni Foam.

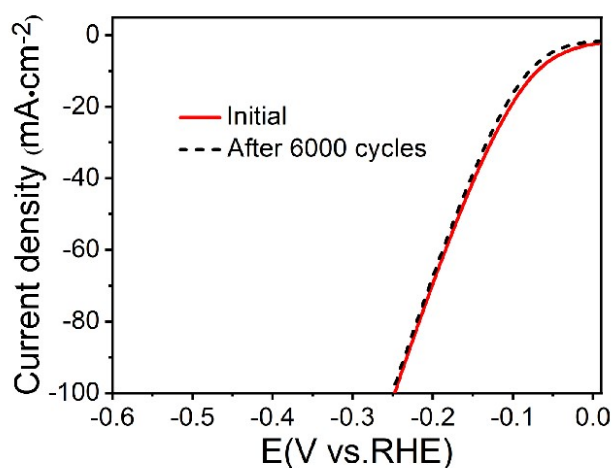

**Fig. S10.** HER LSV curves of N-MoS<sub>2</sub>·Ni<sub>3</sub>S<sub>2</sub>/NiS before and after 6000 CVs.

MoS<sub>2</sub>·Ni<sub>3</sub>S<sub>2</sub>/NiS-180°C exhibits outstanding stability, HER performance was no decayed after 6000 CVs at 10 mA·cm<sup>-2</sup>.

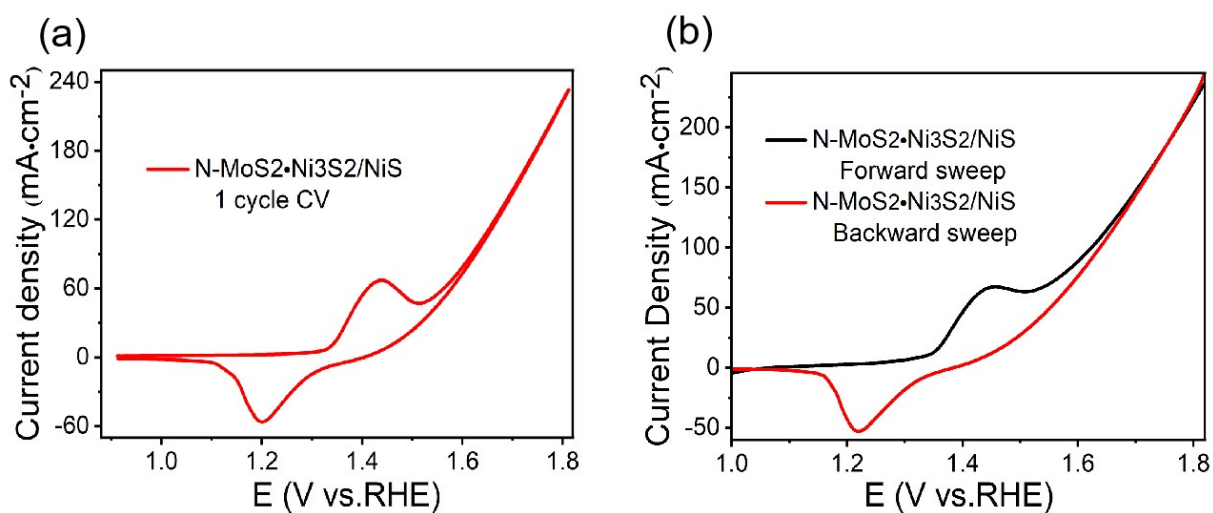

**Fig. S11.** (a) CV curve, (b) Forward/backward sweep OER LSV curve of N-MoS<sub>2</sub>·Ni<sub>3</sub>S<sub>2</sub>/NiS.

From **Fig. S10**, the same characteristics appears in CV curve and LSV polarization curves. Which shows LSV polarization curve collected through backward sweep not only eliminate nickel oxidation peaks influence, but also evaluate well OER performance of N-MoS<sub>2</sub>·Ni<sub>3</sub>S<sub>2</sub>/NiS.

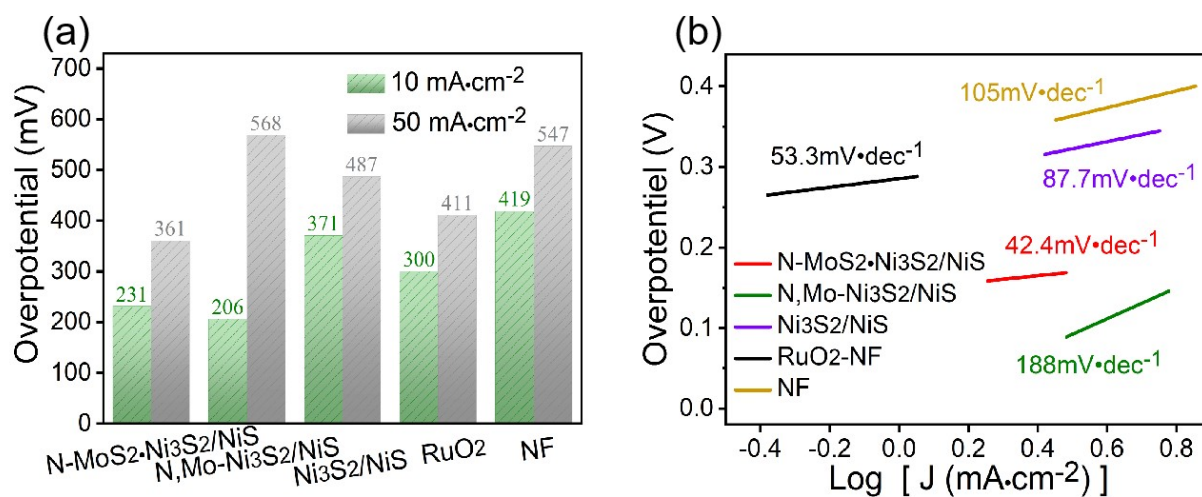

**Fig. S12.** (a) OER performance plot of N-MoS<sub>2</sub>·Ni<sub>3</sub>S<sub>2</sub>/NiS and other control samples at 10 and 50 mA·cm<sup>-2</sup>. (b) Corresponding Tafel slope.

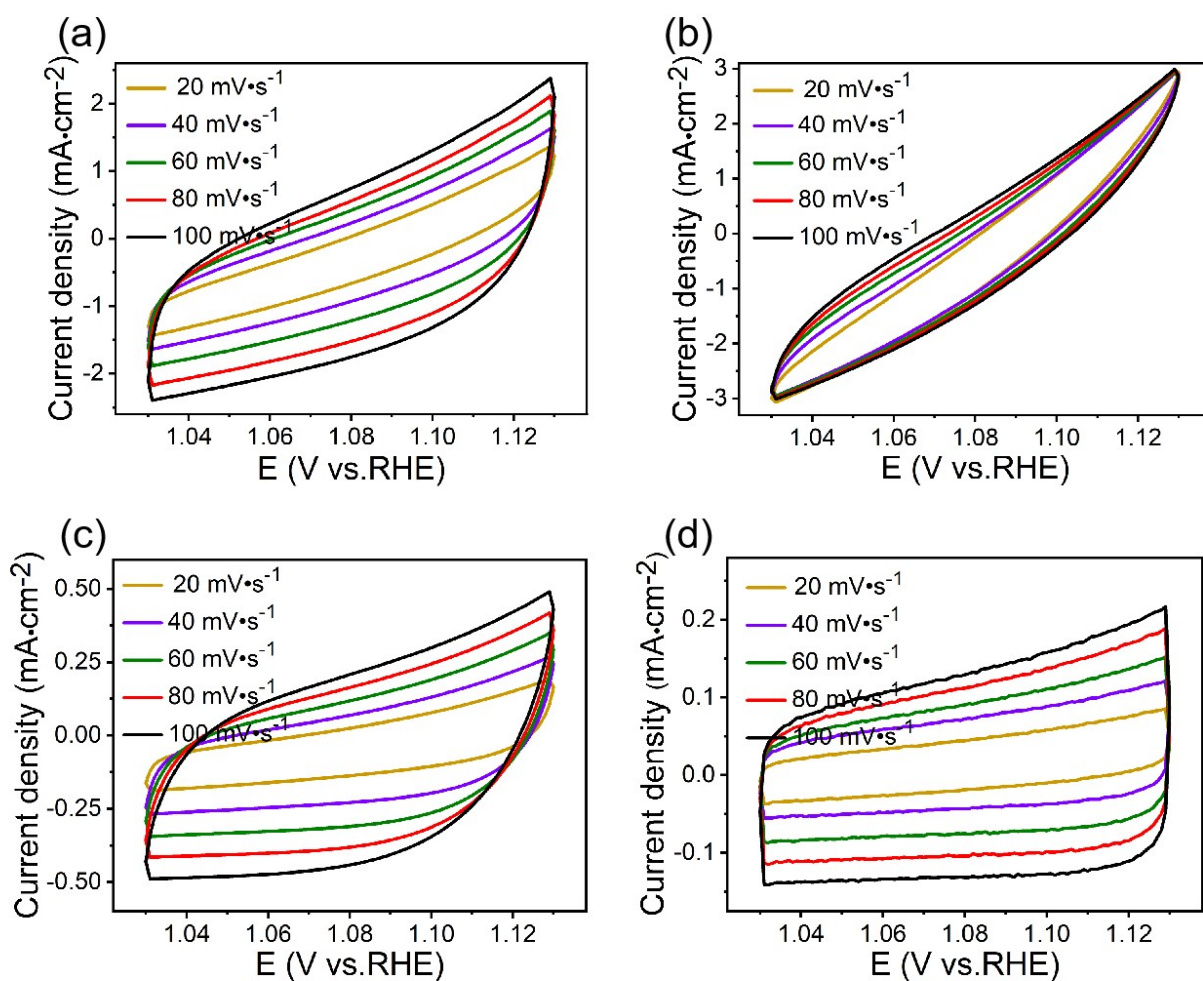

**Fig. S13.** OER Cyclic voltammetry of (a) N-MoS<sub>2</sub>·Ni<sub>3</sub>S<sub>2</sub>/NiS, (b) N,Mo-Ni<sub>3</sub>S<sub>2</sub>/NiS, (c) Ni<sub>3</sub>S<sub>2</sub>/NiS, (d) Ni Foam at scan rate of 20, 40, 60, 80, 100 mV·s<sup>-1</sup> in the potential windows of 1.03V - 1.13V (vs. RHE). (e) Corresponding the double-layer capacitance ( $C_{dl}$ ).

The  $C_{dl}$  is 22.6 mF·cm<sup>-2</sup> for N-MoS<sub>2</sub>·Ni<sub>3</sub>S<sub>2</sub>/NiS, 9.3 mF·cm<sup>-2</sup> for N,Mo-Ni<sub>3</sub>S<sub>2</sub>/NiS, 6.2 mF·cm<sup>-2</sup> for Ni<sub>3</sub>S<sub>2</sub>/NiS, and 2.5 mF·cm<sup>-2</sup> for Ni Foam. The value of N-MoS<sub>2</sub>·Ni<sub>3</sub>S<sub>2</sub>/NiS is about 2.4, 3.6 and 9.1 times higher than N,Mo-Ni<sub>3</sub>S<sub>2</sub>/NiS, Ni<sub>3</sub>S<sub>2</sub>/NiS and Ni Foam, respectively.

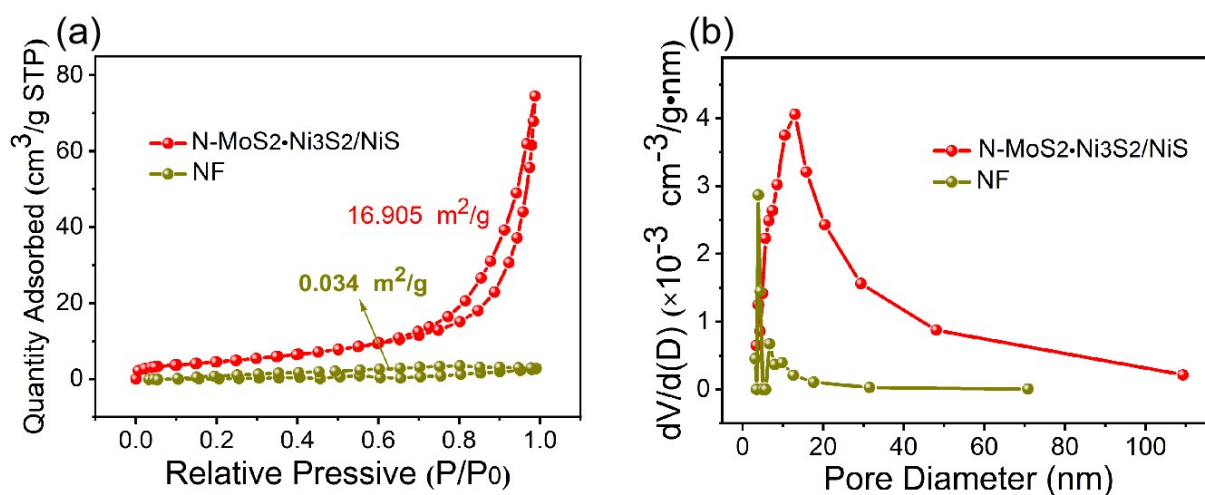

**Fig. S14.** (a) BET specific surface area of N-MoS<sub>2</sub>·Ni<sub>3</sub>S<sub>2</sub>/NiS, NF. (b) Mesoporous pore size distribution plot of N-MoS<sub>2</sub>·Ni<sub>3</sub>S<sub>2</sub>/NiS, NF.

The specific surface area of N-MoS<sub>2</sub>·Ni<sub>3</sub>S<sub>2</sub>/NiS (16.905 m<sup>2</sup>/g) is 497 times higher than NF (0.034 m<sup>2</sup>/g), consistent with continuous ultra-thin hierarchical morphology. And mesoporous pore size is primarily concentrate on 15 nm. The BET results with C<sub>dl</sub> together show N-MoS<sub>2</sub>·Ni<sub>3</sub>S<sub>2</sub>/NiS has larger specific surface area and electrochemical specific surface area to load more active sites, to further improve oxygen evolution reaction performance.



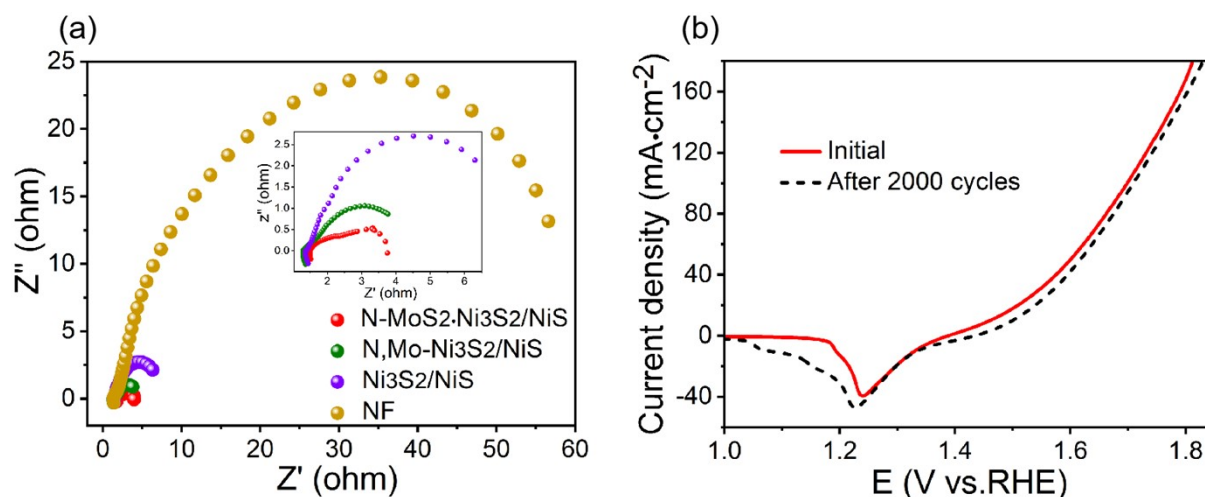

**Fig. 15.** (a) EIS curves of N-MoS<sub>2</sub>·Ni<sub>3</sub>S<sub>2</sub>/NiS, N,Mo-Ni<sub>3</sub>S<sub>2</sub>/NiS, Ni<sub>3</sub>S<sub>2</sub>/NiS and NF at 10 mA·cm<sup>-2</sup> for OER. (b) OER LSV curves before and after 2000 cycles of CV.

The N-MoS<sub>2</sub>·Ni<sub>3</sub>S<sub>2</sub>/NiS has the smallest radius in **Fig. S14a** indicating that it has the smallest impedance, compared to other control samples

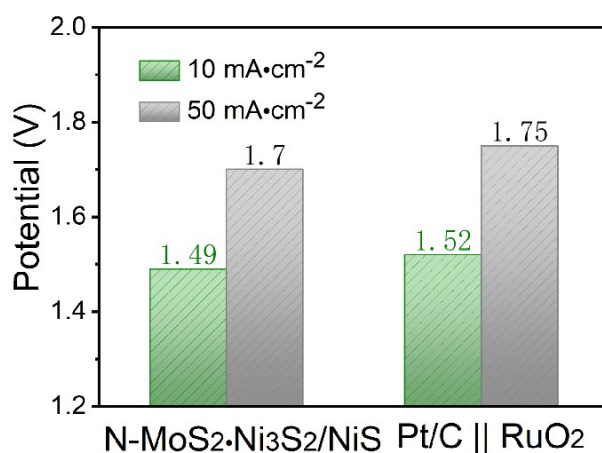

**Fig. S16.** The overall water splitting overpotential of N-MoS<sub>2</sub>·Ni<sub>3</sub>S<sub>2</sub>/NiS||N-MoS<sub>2</sub>·Ni<sub>3</sub>S<sub>2</sub>/NiS and Pt/C||RuO<sub>2</sub> at 10 mA·cm<sup>-2</sup> and 50 mA·cm<sup>-2</sup>.

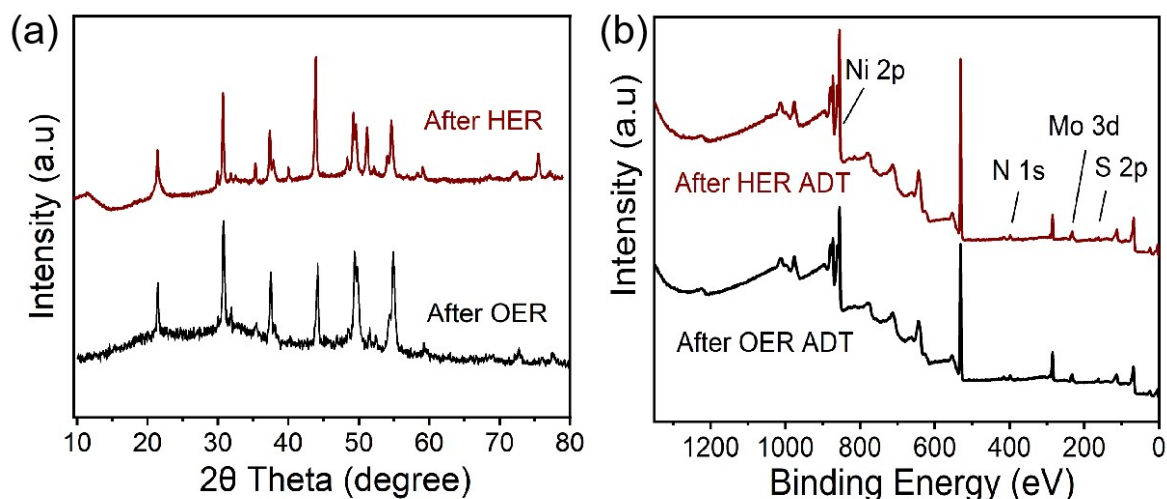

**Fig. S17.** (a) The XRD spectrum, and (b) the XPS spectrum for N-MoS<sub>2</sub>·Ni<sub>3</sub>S<sub>2</sub>/NiS after HER and OER stability test.

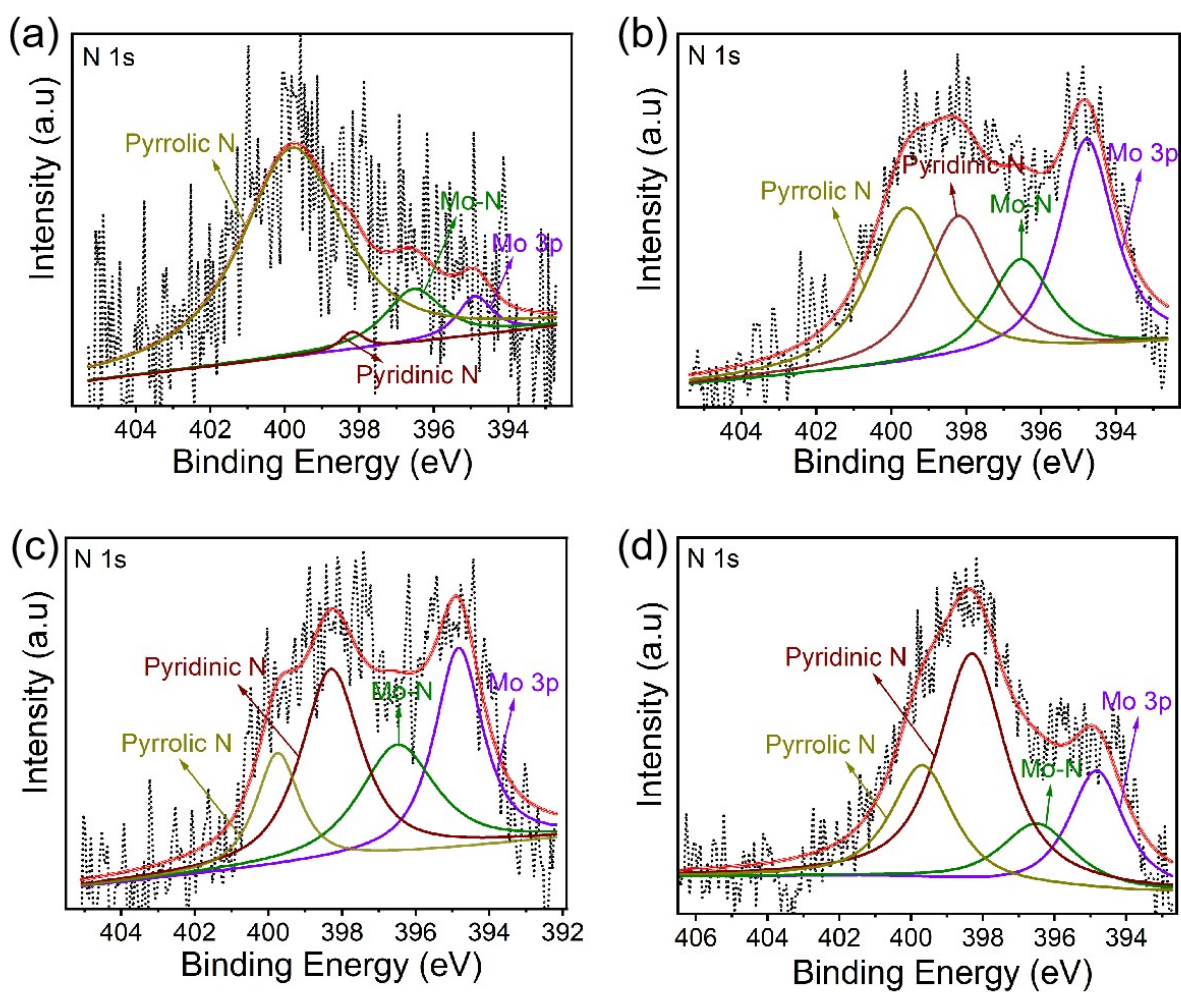

**Fig. S18.** The N 1s XPS spectrum of N-MoS<sub>2</sub>·Ni<sub>3</sub>S<sub>2</sub>/NiS were prepared at (a) 120°C, (b) 150°C, (c) 180°C, (d) 210°C.

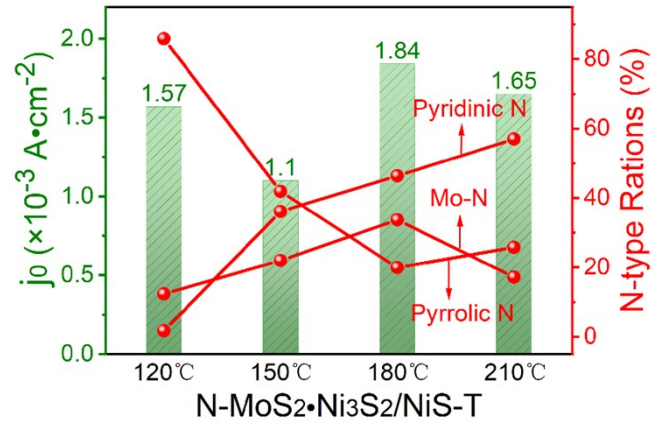

**Fig. S19.** The plot of exchange current density ( $j_0$ ) with respect to N-type ratios (%).

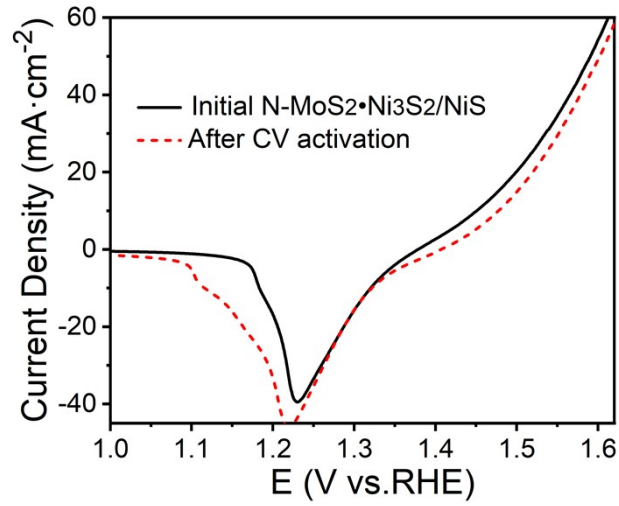

**Fig. S20.** The OER LSV polarization curves of N-MoS<sub>2</sub>·Ni<sub>3</sub>S<sub>2</sub>/NiS before and after CV activation.

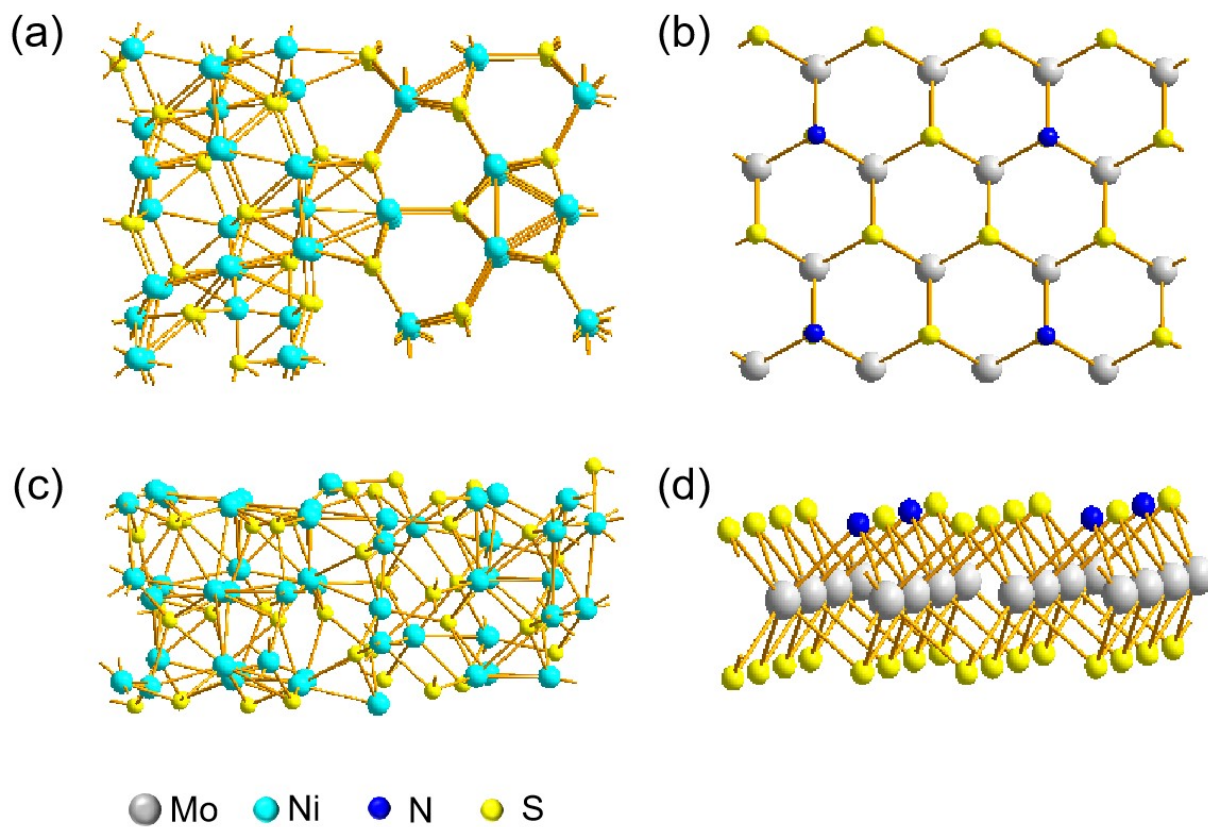

**Fig. S21.** Structural model diagram from different perspectives. Top view of (a)  $\text{Ni}_3\text{S}_2/\text{NiS}$ , and (b)  $\text{N-MoS}_2$ . Side view of (c)  $\text{Ni}_3\text{S}_2/\text{NiS}$ , and (d)  $\text{N-MoS}_2$ .

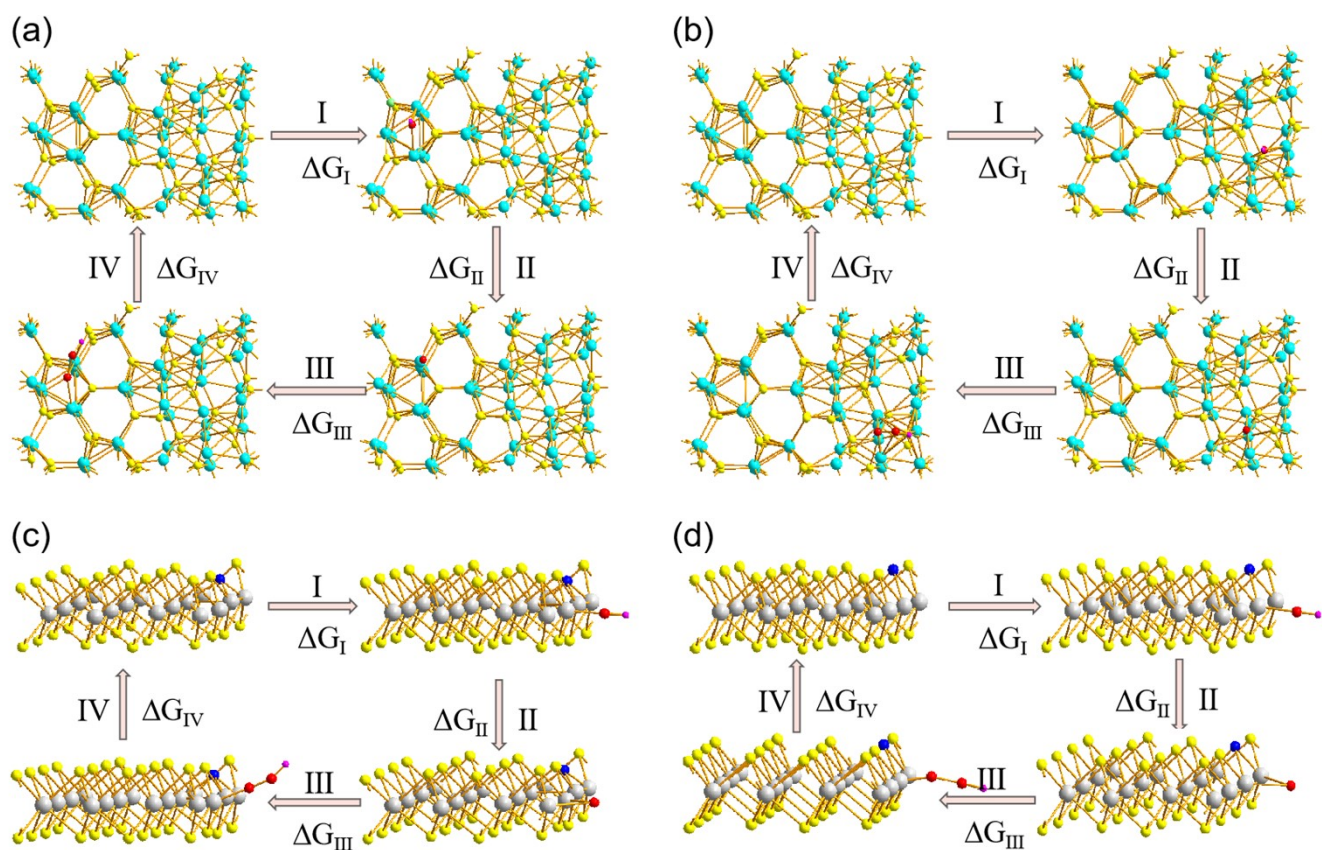

**Fig. 22.** The OER 4e<sup>-</sup> process of (a) NiS side, (b) Ni<sub>3</sub>S<sub>2</sub> side, (c) Mo-S site and (d) Mo-N site.

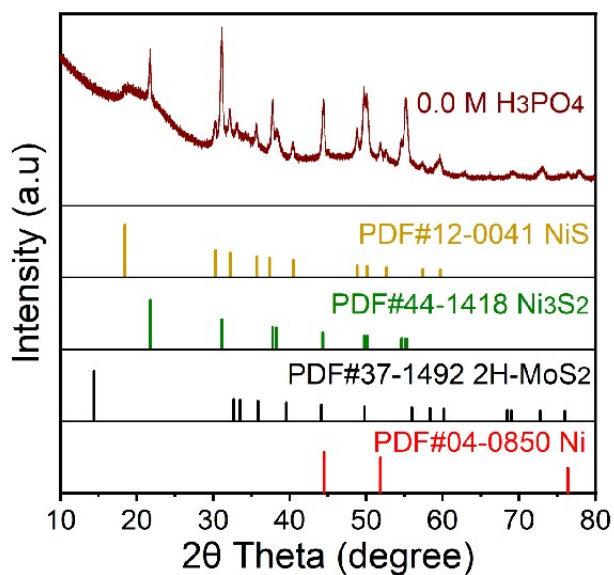

**Fig. S23.** XRD spectrum of N-MoS<sub>2</sub>·Ni<sub>3</sub>S<sub>2</sub>/NiS immersed in 0.0 M H<sub>3</sub>PO<sub>4</sub>.

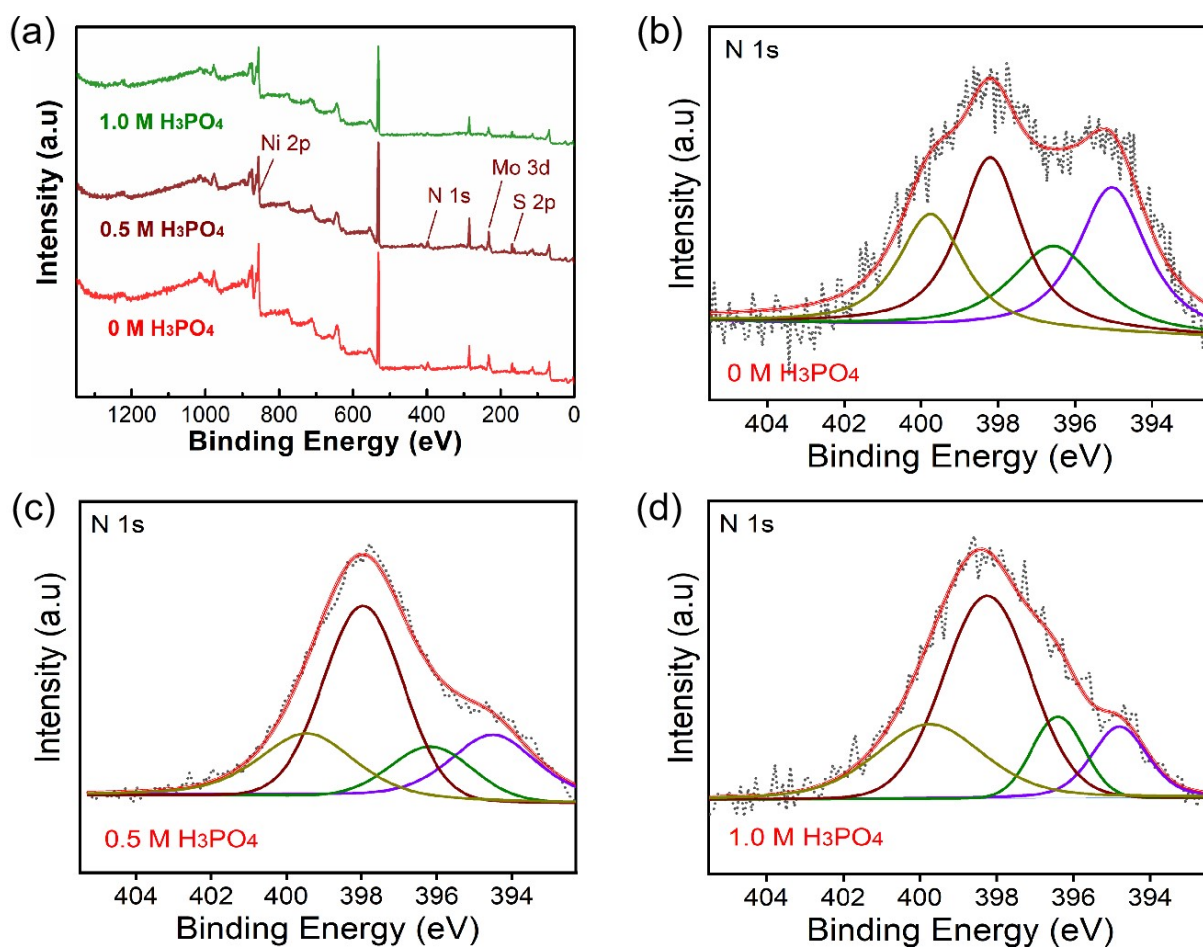

**Fig. S24.** The N 1s XPS spectrum of N-MoS<sub>2</sub>·Ni<sub>3</sub>S<sub>2</sub>/NiS were immersed in (a) 0.0 M, (b) 0.5 M, (c) 1.0 M H<sub>3</sub>PO<sub>4</sub> for 13 h, respectively.

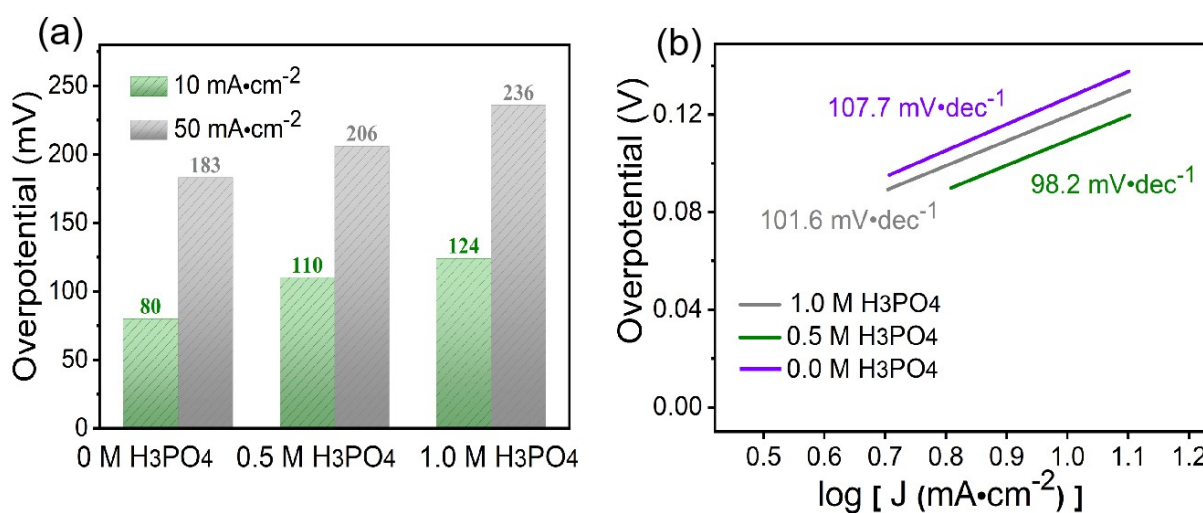

**Fig. S25.** (a) The HER overpotential of N-MoS<sub>2</sub>·Ni<sub>3</sub>S<sub>2</sub>/NiS immersed in different concentration H<sub>3</sub>PO<sub>4</sub>(aq) for 13 h at room temperature. (b) Corresponding Tafel slope.

**Table S1.** Total N content and different N-type relative ratios for N-MoS<sub>2</sub>·Ni<sub>3</sub>S<sub>2</sub>/NiS were synthesized at 120, 150, 180, 210°C, respectively.

| Catalyst                                                      | Total N content | Different N-type relative ratios |             |            |
|---------------------------------------------------------------|-----------------|----------------------------------|-------------|------------|
|                                                               |                 | Mo-N bond                        | Pyridinic N | Pyrrolic N |
| N-MoS <sub>2</sub> ·Ni <sub>3</sub> S <sub>2</sub> /NiS-120°C | 4.49%           | 12.35%                           | 1.72%       | 85.93%     |
| N-MoS <sub>2</sub> ·Ni <sub>3</sub> S <sub>2</sub> /NiS-150°C | 3.94%           | 21.97%                           | 36.12%      | 41.91%     |
| N-MoS <sub>2</sub> ·Ni <sub>3</sub> S <sub>2</sub> /NiS-180°C | 3.60%           | <b>33.69%</b>                    | 46.38%      | 19.93%     |
| N-MoS <sub>2</sub> ·Ni <sub>3</sub> S <sub>2</sub> /NiS-210°C | 3.18%           | 17.19%                           | 57%         | 25.81%     |

The best HER performance (70 mV@10 mA·cm<sup>-2</sup>) corresponds to the highest relative ratios of Mo-N bond (33.69%) when N-MoS<sub>2</sub>·Ni<sub>3</sub>S<sub>2</sub>/NiS was synthesized at 180°C.

**Table S2.** Total N content and different N-type relative ratios for N-MoS<sub>2</sub>·Ni<sub>3</sub>S<sub>2</sub>/NiS that were soaked in different concentrations H<sub>3</sub>PO<sub>4</sub>(aq) for 13 h.

| Catalyst                                                                                     | Total N content | Different N-type relative ratios |             |            |
|----------------------------------------------------------------------------------------------|-----------------|----------------------------------|-------------|------------|
|                                                                                              |                 | Mo-N structure                   | Pyridinic N | Pyrrolic N |
| N-MoS <sub>2</sub> ·Ni <sub>3</sub> S <sub>2</sub> /NiS-0 M H <sub>3</sub> PO <sub>4</sub>   | 3.80%           | <b>32.42%</b>                    | 40.38%      | 27.20%     |
| N-MoS <sub>2</sub> ·Ni <sub>3</sub> S <sub>2</sub> /NiS-0.5 M H <sub>3</sub> PO <sub>4</sub> | 3.49%           | 17.16%                           | 56.39%      | 26.45%     |
| N-MoS <sub>2</sub> ·Ni <sub>3</sub> S <sub>2</sub> /NiS-1.0 M H <sub>3</sub> PO <sub>4</sub> | 3.15%           | 13.47%                           | 57.06%      | 29.47%     |

**Table S3.** The Gibbs free energy changes of each reaction step and  $\eta_{\text{OER}}$  in the OER 4e<sup>-</sup> process for different active catalytic sites of N-MoS<sub>2</sub> and Ni<sub>3</sub>S<sub>2</sub>/NiS.

| Active catalytic site                                                      | $\Delta G_{\text{I}}$ (eV) | $\Delta G_{\text{II}}$ (eV) | $\Delta G_{\text{III}}$<br>(eV) | $\Delta G_{\text{IV}}$ (eV) | $\eta_{\text{OER}}$ (V) |
|----------------------------------------------------------------------------|----------------------------|-----------------------------|---------------------------------|-----------------------------|-------------------------|
| Mo-N site of N-MoS <sub>2</sub>                                            | 0.273                      | -0.049                      | 3.074                           | 1.621                       | 1.844                   |
| Mo-S site of N-MoS <sub>2</sub>                                            | -0.055                     | -0.056                      | 3.425                           | 1.606                       | 2.195                   |
| NiS side of Ni <sub>3</sub> S <sub>2</sub> /NiS                            | 0.427                      | 0.465                       | 2.787                           | 1.241                       | 1.557                   |
| Heterogeneous interface of<br>Ni <sub>3</sub> S <sub>2</sub> /NiS          | 0.028                      | 1.482                       | 1.728                           | 1.681                       | 0.498                   |
| Ni <sub>3</sub> S <sub>2</sub> side of Ni <sub>3</sub> S <sub>2</sub> /NiS | 0.465                      | 1.205                       | 1.39                            | 1.857                       | 0.628                   |

The OER 4e<sup>-</sup> process reaction step:

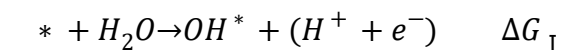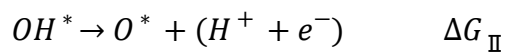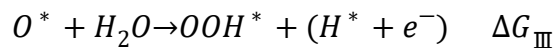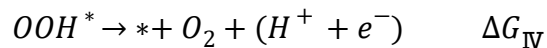



**Table S4.** The HER, OER, and water splitting performance comparison between our catalyst N-MoS<sub>2</sub>·Ni<sub>3</sub>S<sub>2</sub>/NiS and reported recently Mo-/Ni-based catalysts.

| Catalyst                                                   | $\eta_{10}$ of HER (mV) | $\eta_{10}$ of OER (mV) | $\eta_{10}$ of overall water splitting (V) | Reference        |
|------------------------------------------------------------|-------------------------|-------------------------|--------------------------------------------|------------------|
| <b>N-MoS<sub>2</sub>·Ni<sub>3</sub>S<sub>2</sub>/NiS</b>   | <b>70</b>               | <b>232</b>              | <b>1.4</b>                                 | <b>This work</b> |
| MoS <sub>2</sub> -AB/NF                                    | 77                      | 243                     | 1.51                                       | [ 7 ]            |
| Ni <sub>2</sub> P-nanoparticle/Ni <sub>2</sub> P-nanosheet | 116                     | --                      | 1.63                                       | [ 8 ]            |
| N-NiMoO <sub>4</sub> /NiS <sub>2</sub>                     | 99                      | 283                     | 1.60                                       | [ 9 ]            |
| Mo-doped Ni <sub>2</sub> P                                 | 81                      | 270                     | 1.54                                       | [10 ]            |
| FeNi-Mo <sub>2</sub> C/CF                                  | 81                      | 228                     | 1.53                                       | [ 11 ]           |
| Ni/Ni(OH) <sub>2</sub>                                     | 77                      | 270                     | 1.59                                       | [ 12 ]           |
| NiS <sub>0.5</sub> Se <sub>0.5</sub>                       | 70                      | 257                     | 1.55                                       | [ 13 ]           |
| MoS <sub>2</sub> -Ni <sub>3</sub> S <sub>2</sub> HNRs/NF   | 98                      | 249                     | 1.50                                       | [ 14 ]           |
| FeCoMoS@NG                                                 | 137                     | 238                     | 1.58                                       | [ 15 ]           |
| Fe-MoS <sub>2</sub> /CoMo <sub>2</sub> S <sub>4</sub>      | 122                     | 290                     | 1.62                                       | [ 16 ]           |
| MoS <sub>2</sub> -NiS <sub>2</sub> /NGF                    | 172                     | 370                     | 1.64                                       | [ 17 ]           |

## Reference

- [1] J. P. Perdew, K. Burke, M. Ernzerhof, *Phys. Rev. Lett.* 77 (1996) 3865-3868.
- [2] G. Kresse, D. Joubert, *Phys. Rev. B* 59 (1999) 1758-1775.
- [3] P. E. Blöchl, *Phys. Rev. B* 50 (1994) 17953–17979.
- [4] D. J. Chadi, *Phys. Rev. B* 16 (1977) 1746-1747.
- [5] L. Deng, F. Hu, M. Ma, S.C. Huang, Y. Xiong, H.Y. Chen, L. Li, S. Peng, *Angew. Chem. Int. Ed.* 60 (2021) 22276-22282.
- [6] X. Ji, Y. Lin, J. Zeng, Z. Ren, Z. Lin, Y. Mu, Y. Qiu, J. Yu, *Nat. Commun.* 12 (2021) 1380.
- [7] L. Guo, Q. Liu, Y. Liu, Z. Chen, Y. Jiang, H. Jin, T. Zhou, J. Yang, Y. Liu, *Nano Energy.* (2021) 106707.
- [8] Y. Yang, K. Zhang, H. Lin, X. Li, H.C. Chan, L. Yang, Q. Gao, *Adv. Funct. Mater.* 29 (2019) 1805298.
- [9] Q. Wang, H. Zhao, F. Li, W. She, X. Wang, L. Xu, H. Jiao, *J. Mater. Chem. A* 7 (2019) 7636-7643.
- [10] F. Peng, L. Zhang, B. Jiang, H. Dou, M. Xu, N. Yang, J. Zhang, Y. Sun, *Chem. Eng. J.* 427 (2022) 131712.
- [11] L. Dai, Z.N. Chen, L. Li, P. Yin, Z. Liu, H. Zhang, *Adv. Mater.* 32 (2020) 1906915.
- [12] B. Chen, D. Kim, Z. Zhang, M. Lee, K. Yong, *Chem. Eng. J.* 422 (2021) 130533.
- [13] Y. Yang, K. Zhang, H. Lin, X. Li, H.C. Chan, L. Yang, Q. Gao, *ACS Catal.* 7 (2017) 2357-2366.
- [14] S. Ramakrishnan, J. Balamurugan, M. Vinothkannan, A.R. Kim, S. Sengodan, D.J. Yoo, *Appl. Catal. B: Environ.* 279 (2020) 119381.
- [15] Y. Guo, J. Tang, J. Henzie, B. Jiang, W. Xia, T. Chen, Y. Bando, Y. Kang, M.S.A. Hossain, Y. Sugahara, Y. Yamauchi, *ACS Nano* 14 (2020) 4141-4152.
- [16] P. Kuang, M. He, H. Zou, J. Yu, K. Fan, *Appl. Catal. B: Environ.* (2019) 15-25.
- [17] B. Geng, F. Yan, L. Liu, C. Zhu, B. Li, Y. Chen, *Chem. Eng. J.* 46 (2021) 126815.
